# Supplementary material
Source: MDPI journal article supplement (https://www.mdpi.com/2073-4441/13/12/1716)
Supplement: s1 [file s1]

## Article

# Supplementary Material: Influence of Environmental Factors on Occurrence of Cyanobacteria and Abundance of Saxitoxin-Producing Cyanobacteria in a Subtropical Drinking Water Reservoir in Brazil

Munique A. B. Moraes <sup>1</sup>, Raphaella A. M. Rodrigues <sup>1</sup>, Louise Schlüter <sup>2</sup>, Raju Podduturi <sup>3</sup>, Niels O. G. Jørgensen <sup>3,\*</sup> and Maria C. Calijuri <sup>1</sup>

<sup>1</sup> Department of Hydraulics and Sanitation, São Carlos School of Engineering, University of São Paulo, 400 Trabalhador São Carlense Avenue, São Carlos 13566-590, , Brazil; muniquebio@gmail.com (M.A.B.M.); raphaella.magalhaes@gmail.com (R.A.M.R.); calijuri@sc.usp.br (M.C.C.)

<sup>2</sup> Environment and Toxicology, DHI, Agern Alle 5, 2970 Hørsholm, Denmark; lsc@dhigroup.com

<sup>3</sup> Department of Plant and Environmental Sciences, University of Copenhagen, Thorvaldsensvej 40, 1871 Frederiksberg, Denmark; Podduturi@plen.ku.dk

\* Correspondence: nogj@plen.ku.dk

**Citation:** Moraes, M.A.B.; Rodrigues, R.A.M.; Schlüter, L.; Podduturi, R.; Jørgensen, N.O.G.; Calijuri, M.C. Influence of Environmental Factors on Occurrence of Cyanobacteria and Abundance of Saxitoxin-Producing Cyanobacteria in a Subtropical Drinking Water Reservoir in Brazil. *Water* **2021**, *13*, 1716. <https://doi.org/10.3390/w13121716>

Academic Editor: Katarzyna Kowalczyńska-Madura

Received: 14 May 2021

Accepted: 17 June 2021

Published: 21 June 2021

**Publisher's Note:** MDPI stays neutral with regard to jurisdictional claims in published maps and institutional affiliations.

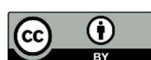

**Copyright:** © 2021 by the authors. Licensee MDPI, Basel, Switzerland. This article is an open access article distributed under the terms and conditions of the Creative Commons Attribution (CC BY) license (<http://creativecommons.org/licenses/by/4.0/>).

**Table S1.** Characteristics of the Itupararanga reservoir and sampling sites (riverine and dam zones).

| Characteristics                                      | Itupararanga                      |                              |
|------------------------------------------------------|-----------------------------------|------------------------------|
| Surface area (km <sup>2</sup> )                      | 20.9                              |                              |
| Maximum volume (10 <sup>6</sup> m <sup>3</sup> )     | 286.0                             |                              |
| Perimeter (km)                                       | 192.8                             |                              |
| Maximum water flow (m <sup>3</sup> s <sup>-1</sup> ) | 39.0                              |                              |
| Water residence time (days)                          | 250                               |                              |
| Main tributaries                                     | Sorocamirim and Sorocabuçu rivers |                              |
| Hydrographic basin                                   | Sorocaba and Middle Tietê River   |                              |
| Characteristics                                      | Riverine zone                     | Dam zone                     |
| *Geographic location                                 | 23°37'24.8" S, 47°13'53.4" W      | 23°36'50.7" S, 47°23'27.3" W |
| *Maximum depth (m)                                   | 6.5                               | 18.5                         |
| *Average depth (m)                                   | 5.0                               | 16.5                         |

Source: Cunha and Calijuri [29]; Cunha [103]; Beghelli et al. [30]; \*this study.

**Table S2.** List of phytoplankton pigments included in HPLC analysis and taxonomic designations.

|    | Pigment            | Designation              |
|----|--------------------|--------------------------|
| 1  | $\alpha$ -carotene |                          |
| 2  | Alloxanthin        | Cryptophytes             |
| 3  | Antheraxanthin     | Green algae              |
| 4  | Aphanizophyll      | Cyanobacteria            |
| 5  | $\beta$ -carotene  |                          |
| 6  | Canthaxanthin      | Cyanobacteria            |
| 7  | Chlorophyll a      |                          |
| 8  | Chlorophyll b      | Green algae              |
| 9  | Chlorophyll c2     |                          |
| 10 | Chlorophyll c3     | Diatoms and chrysophytes |
| 11 | Chlorophyllide a   |                          |
| 12 | Diadinoxanthin     |                          |
| 13 | Diatoxanthin       |                          |
| 14 | Echinenone         | Cyanobacteria            |
| 15 | Fucoxanthin        | Diatoms and chrysophytes |
| 16 | Lutein             | Green algae              |
| 17 | Myxoxanthophyll    | Cyanobacteria            |
| 18 | Neoxanthin         | Green algae              |
| 19 | Peridinin          | Dinoflagellates          |
| 20 | Pheophytin a       |                          |
| 21 | Violaxanthin       | Green algae              |
| 22 | Zeaxanthin         | Cyanobacteria            |

**Table 3.** PCR and *in silico* PCR with cyanobacteria strains for investigation of specificity of the primer set *sxtA*-cyano on detection of *sxtA* gene (+ and – indicate positive or negative PCR reaction, respectively).

| Strains                                                | PCR | In silico PCR | Strain procured from |
|--------------------------------------------------------|-----|---------------|----------------------|
| Aphanizomenon gracile K-0549                           | +   |               | SCCAP, Denmark       |
| Dolichospermum lemmermannii K-0584                     | +   |               | SCCAP, Denmark       |
| Microcystis aeruginosa CCMA-UFSCar 666                 | –   |               | CCMA-UFSCar, Brazil  |
| Microcystis aeruginosa PCC-7820                        | –   |               | PCC, France          |
| Microcystis wesenbergii NIES-107                       | –   |               | NIES, Japan          |
| Raphidiopsis raciborskii CYRF-1                        | +   |               | LETC, Brazil         |
| Raphidiopsis raciborskii T3                            | +   |               | LETC, Brazil         |
| Raphidiopsis raciborskii CYLP-1                        | –   |               | LETC, Brazil         |
| Raphidiopsis raciborskii NPC-1                         | –   |               | LETC, Brazil         |
| Aphanizomenon gracile Aphanizomenon ovalisporum UAM287 |     | +             |                      |
| Dolichospermum circinale                               |     | +             |                      |
| Dolichospermum flos-aquae ANA311E                      |     | +             |                      |

|                          |   |
|--------------------------|---|
| Lyngbya wollei           | + |
| Raphidiopsis raciborskii | + |
| Heteroscytonema          | + |
| crispum                  |   |

SCCAP = Scandinavian Culture Collection of Algae and Protozoa; CCMA-UFSCar = Collection of Freshwater Microalgae Cultures of Federal University of São Carlos; PCC = Pasteur Culture Collection; NIES = National Institute for Environmental Studies; LETC = Laboratory of Ecophysiology and Toxicology of Cyanobacteria of Federal University of Rio de Janeiro.

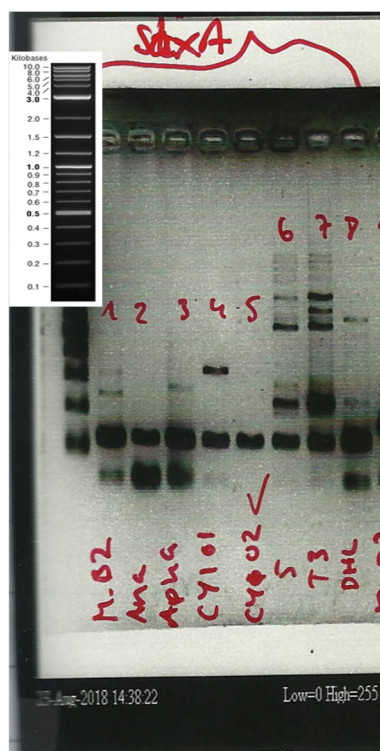

**Figure S1.** Agarose gel picture showing the PCR amplicons against 2-log ladder. The PCR was performed using primer pair reported by Al-Tebrineh et al. [15] for targeting the *sxtA* gene. DNA from several saxitoxin-producing cyanobacteria was used as template. As can be seen on the gel picture, a non-target amplification occurred for some strains when using the *sxtA* primer set by Al-Tebrineh et al. [15].

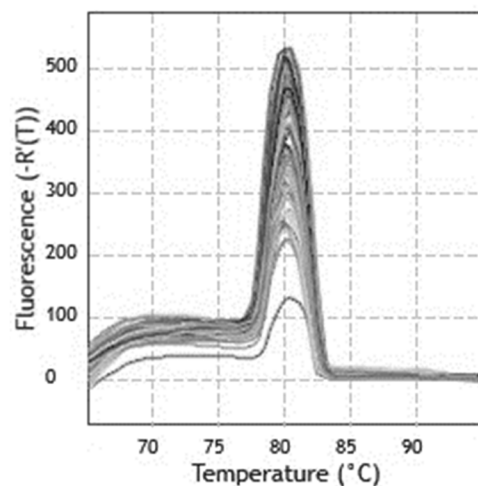

**Figure S2.** Melting curve for the *sxtA* primer set for standards and environmental samples showing a single peak ( $T_m = 80 - 80.5^\circ\text{C}$ ) that indicates amplification of a single amplicon.  $T_m$  = melting temperature.

**Table 4.** List of the phytoplankton taxa identified in Itupararanga reservoir.

| Taxa                                                               | Riverine zone |   |        |   |        |   |        |   | Dam zone |   |        |   |        |   |        |   |
|--------------------------------------------------------------------|---------------|---|--------|---|--------|---|--------|---|----------|---|--------|---|--------|---|--------|---|
|                                                                    | May 17        |   | Aug 17 |   | Oct 17 |   | Jan 18 |   | May 17   |   | Aug 17 |   | Oct 17 |   | Jan 18 |   |
|                                                                    | 100           | 1 | 100    | 1 | 100    | 1 | 100    | 1 | 100      | 1 | 100    | 1 | 100    | 1 | 100    | 1 |
| <b>Chrysophytes</b>                                                | +             | + | +      | + | +      | + | +      | + |          |   | +      |   |        |   | +      | + |
| Chromulina elegans Doflein 1921                                    | +             | + | +      | + | +      | + | +      | + |          |   |        |   |        |   |        |   |
| Dinobryon divergens O.E. Imhof 1887                                |               |   |        |   |        |   | +      | + |          |   |        |   |        |   | +      | + |
| Mallomonas sp.                                                     |               |   |        |   |        |   | +      |   |          |   |        |   |        |   |        |   |
| Synura sp.                                                         |               |   | +      |   |        |   |        | + |          |   | +      |   |        |   |        |   |
| <b>Cryptophytes</b>                                                | +             |   | +      | + | +      | + | +      | + | +        | + | +      | + |        | + | +      | + |
| Cryptomonas brasiliensis A. Castro, C.E.M. Bicudo & D. Bicudo 1992 |               |   |        |   |        |   | +      |   | +        |   | +      |   |        |   | +      |   |
| Cryptomonas erosaria Ehrenberg 1832                                | +             |   | +      | + | +      | + | +      | + | +        | + | +      | + |        |   | +      | + |
| Rhodomonas lacustris Pascher & Ruttner 1913                        |               |   | +      | + |        | + | +      | + |          |   |        |   |        | + |        |   |
| <b>Cyanobacteria</b>                                               | +             | + | +      | + | +      | + | +      | + | +        | + | +      | + | +      | + | +      | + |
| Aphanizomenon                                                      |               |   | +      |   |        | + |        |   | +        | + | +      | + |        | + |        | + |

| Taxa                                                                                                    | Riverine zone |   |        |   |        |   |        |   | Dam zone |   |        |   |        |   |        |   |
|---------------------------------------------------------------------------------------------------------|---------------|---|--------|---|--------|---|--------|---|----------|---|--------|---|--------|---|--------|---|
|                                                                                                         | May 17        |   | Aug 17 |   | Oct 17 |   | Jan 18 |   | May 17   |   | Aug 17 |   | Oct 17 |   | Jan 18 |   |
|                                                                                                         | 100           | 1 | 100    | 1 | 100    | 1 | 100    | 1 | 100      | 1 | 100    | 1 | 100    | 1 | 100    | 1 |
| non<br>gracile<br>Lemm<br>erman<br>n 1907                                                               |               |   |        |   |        |   |        |   |          |   |        |   |        |   |        |   |
| 9 Aphan<br>ocapas<br>a<br>incerta<br>(Lemm<br>erman<br>n)<br>G.Cro<br>nberg<br>&<br>Komár<br>ek<br>1994 |               |   | +      | + |        |   | +      | + |          |   |        |   |        |   |        |   |
| 10 Aphan<br>ocapsa<br>delicati<br>ssima<br>West<br>& G. S.<br>West<br>1912                              |               |   | +      |   |        |   |        |   | +        |   | +      | + |        | + |        |   |
| 11 Aphan<br>ocapsa<br>elachis<br>ta<br>West<br>& G.S.<br>West<br>1894                                   |               |   |        | + | +      | + | +      | + | +        | + | +      | + | +      | + | +      | + |
| 12 Aphan<br>ocapsa<br>sp.                                                                               | +             | + | +      | + | +      | + | +      | + | +        | + | +      | + | +      | + | +      | + |
| 13 Aphan<br>othece<br>sp.                                                                               |               |   |        |   |        |   |        |   |          |   |        |   | +      |   | +      |   |
| 14 Chrooc<br>occus<br>sp.                                                                               |               |   |        |   |        |   |        |   |          |   |        |   |        | + |        |   |
| 15 Cuspi<br>dothri<br>x sp.                                                                             |               |   |        |   |        |   |        |   | +        |   | +      | + |        |   |        |   |
| 16 Dolich<br>osper<br>mum<br>solitari<br>um<br>(Kleba<br>hn)                                            |               |   |        |   | +      | + | +      | + |          |   |        |   |        |   | +      | + |



[illegible]

| Taxa | Riverine zone                                                                             |   |        |   |        |   |        |   | Dam zone |   |        |   |        |   |        |   |
|------|-------------------------------------------------------------------------------------------|---|--------|---|--------|---|--------|---|----------|---|--------|---|--------|---|--------|---|
|      | May 17                                                                                    |   | Aug 17 |   | Oct 17 |   | Jan 18 |   | May 17   |   | Aug 17 |   | Oct 17 |   | Jan 18 |   |
|      | 100                                                                                       | 1 | 100    | 1 | 100    | 1 | 100    | 1 | 100      | 1 | 100    | 1 | 100    | 1 | 100    | 1 |
| 30   | Aulaco<br>seira<br>granul<br>ata<br>(Ehren<br>berg)<br>Simon<br>sen<br>1979               | + |        | + | +      |   |        | + | +        |   |        | + |        |   |        | + |
| 31   | Cyclot<br>ella<br>meneg<br>hinian<br>a<br>Kützin<br>g 1844                                | + | +      | + | +      | + | +      | + | +        | + |        |   |        |   | +      |   |
| 32   | Discost<br>ella<br>stellige<br>ra<br>(Cleve<br>&<br>Gruno<br>w)<br>Houk<br>& Klee<br>2004 |   |        | + | +      |   |        |   |          |   |        |   |        | + |        | + |
| 33   | Encyo<br>nopsis<br>sp.                                                                    | + | +      |   |        |   | +      |   |          |   |        | + |        |   |        |   |
| 34   | Fragila<br>ria<br>aquapl<br>us<br>Lange-<br>Bertalo<br>t & S.<br>Ulrich<br>2014           |   |        |   |        |   |        | + |          |   |        |   |        |   |        |   |
| 35   | Fragila<br>ria<br>gruno<br>wii<br>Lange-<br>Bertalo<br>t & S.<br>Ulrich<br>2014           | + | +      | + | +      | + | +      |   | +        | + | +      | + | +      | + | +      | + |
| 36   | Fragila<br>ria<br>longifu<br>siformi<br>s                                                 |   |        |   |        |   | +      | + | +        |   |        |   |        | + |        | + |



| Taxa                                                           | Riverine zone |   |        |   |        |   |        |   | Dam zone |   |        |   |        |   |        |   |
|----------------------------------------------------------------|---------------|---|--------|---|--------|---|--------|---|----------|---|--------|---|--------|---|--------|---|
|                                                                | May 17        |   | Aug 17 |   | Oct 17 |   | Jan 18 |   | May 17   |   | Aug 17 |   | Oct 17 |   | Jan 18 |   |
|                                                                | 100           | 1 | 100    | 1 | 100    | 1 | 100    | 1 | 100      | 1 | 100    | 1 | 100    | 1 | 100    | 1 |
| (Hains & Sebrin g) Siver et al.                                |               |   |        |   |        |   |        |   |          |   |        |   |        |   |        |   |
| 37 Fragilaria spectra P.D.Almeida, E.Morales & C.E.Wetzel 2016 | +             |   | +      | + |        | + |        |   | +        | + |        | + |        |   |        |   |
| 38 Navicula sp.                                                | +             | + |        |   |        |   |        |   |          |   |        |   |        |   |        |   |
| 39 Pinnularia sp.                                              | +             |   |        | + |        |   |        |   |          |   |        |   |        |   |        |   |
| <b>Dinoflagellates</b>                                         | +             |   |        |   | +      | + | +      | + |          | + | +      | + |        |   |        |   |
| 40 Ceratium furcoides (Levan der) Langhans 1925                | +             |   |        |   | +      | + |        |   | +        |   |        | + |        |   |        |   |
| 41 Peridinium sp.                                              |               |   |        |   |        |   | +      | + |          |   | +      | + |        |   |        |   |
| <b>Euglenophytes</b>                                           | +             | + | +      | + | +      | + | +      | + |          | + | +      | + | +      | + |        | + |
| 42 Euglena sp.                                                 | +             |   |        |   | +      |   | +      | + |          | + |        | + |        |   |        |   |
| 43 Phacus sp.                                                  |               |   |        |   |        |   | +      |   |          |   |        |   |        |   |        |   |
| 44 Trachelomonas spinosa A. Stokes 1890                        |               | + |        |   |        |   |        |   |          |   |        |   |        |   |        |   |
| 45 Trachelomonas volvocina (Ehren                              | +             | + | +      | + | +      | + | +      | + |          | + | +      | + | +      | + |        | + |

| Taxa                                                                                         | Riverine zone |   |        |   |        |   |        |   | Dam zone |   |        |   |        |   |        |   |
|----------------------------------------------------------------------------------------------|---------------|---|--------|---|--------|---|--------|---|----------|---|--------|---|--------|---|--------|---|
|                                                                                              | May 17        |   | Aug 17 |   | Oct 17 |   | Jan 18 |   | May 17   |   | Aug 17 |   | Oct 17 |   | Jan 18 |   |
|                                                                                              | 100           | 1 | 100    | 1 | 100    | 1 | 100    | 1 | 100      | 1 | 100    | 1 | 100    | 1 | 100    | 1 |
| berg)<br>Ehrenb<br>erg<br>1834                                                               |               |   |        |   |        |   |        |   |          |   |        |   |        |   |        |   |
| <b>Green algae</b>                                                                           | +             | + | +      | + | +      | + | +      | + | +        | + | +      | + | +      | + | +      | + |
| 46 Actina<br>strum<br>sp.                                                                    | +             |   |        |   |        |   |        |   |          |   |        |   |        |   |        |   |
| 47 Acuto<br>desmu<br>s<br>acumi<br>natus<br>(Lager<br>heim)<br>P. M.<br>Tsaren<br>ko<br>2000 |               |   |        |   |        |   |        |   | +        |   |        |   |        |   |        |   |
| 48 Ankist<br>rodes<br>mus<br>fusifor<br>mis<br>Corda<br>1838                                 |               |   |        |   |        | + |        | + | +        | + | +      | + | +      | + | +      | + |
| 49 Ankist<br>rodes<br>mus<br>gracilis<br>(Reinsc<br>h)<br>Korshi<br>kov<br>1953              |               |   |        |   |        |   | +      |   |          |   |        |   |        |   |        |   |
| 50 Chlam<br>ydomo<br>nas sp.<br>1                                                            | +             |   | +      | + | +      | + | +      | + | +        | + | +      | + | +      |   | +      | + |
| 51 Chlam<br>ydomo<br>nas sp.<br>2                                                            |               |   |        |   |        |   |        | + |          |   |        |   |        | + |        |   |
| 52 Chlore<br>lla sp.                                                                         |               |   | +      |   |        |   | +      | + | +        |   | +      |   |        |   |        |   |
| 53 Closter<br>iopsis<br>longiss<br>ima<br>(Lemm<br>erman<br>n)<br>Lemm                       |               |   |        |   |        |   |        |   | +        | + | +      |   | +      | + |        |   |

| Taxa                                                                          | Riverine zone |   |        |   |        |   |        |   | Dam zone |   |        |   |        |   |        |   |
|-------------------------------------------------------------------------------|---------------|---|--------|---|--------|---|--------|---|----------|---|--------|---|--------|---|--------|---|
|                                                                               | May 17        |   | Aug 17 |   | Oct 17 |   | Jan 18 |   | May 17   |   | Aug 17 |   | Oct 17 |   | Jan 18 |   |
|                                                                               | 100           | 1 | 100    | 1 | 100    | 1 | 100    | 1 | 100      | 1 | 100    | 1 | 100    | 1 | 100    | 1 |
| erman<br>n 1899                                                               |               |   |        |   |        |   |        |   |          |   |        |   |        |   |        |   |
| 54 Closter<br>ium<br>acutu<br>m<br>Brébiss<br>on<br>1848                      | +             |   |        |   |        |   |        |   |          |   | +      |   | +      | + | +      |   |
| 55 Coelas<br>trum<br>microp<br>orum<br>Nägeli<br>1855                         |               |   |        |   |        |   |        | + |          |   |        |   |        |   |        |   |
| 56 Cosma<br>rium<br>sp.                                                       |               |   |        |   |        |   |        |   |          |   |        |   |        |   | +      | + |
| 57 Crucig<br>enia<br>fenestr<br>ata<br>(Schmi<br>dle)<br>Schmi<br>dle<br>1900 |               |   | +      |   |        |   |        |   |          |   |        |   |        |   |        | + |
| 58 Desmo<br>desmu<br>s sp.                                                    |               |   | +      |   |        | + | +      | + |          |   | +      |   |        | + |        | + |
| 59 Eremo<br>sphaer<br>a sp.                                                   |               |   |        |   |        |   |        |   | +        |   |        |   |        |   |        | + |
| 60 Golenk<br>inia sp.                                                         |               |   |        |   |        |   | +      |   |          |   | +      | + |        |   |        |   |
| 61 Kirchn<br>eriella<br>contort<br>a<br>(Schmi<br>dle)<br>Bohlin<br>1897      |               |   | +      | + |        | + |        | + |          |   | +      |   |        | + |        |   |
| 62 Kirchn<br>eriella<br>lunaris<br>(Kirch<br>ner)<br>Möbiu<br>s 1894          |               |   |        |   |        |   |        |   | +        |   | +      |   |        |   |        |   |
| 63 Micrac<br>tinium<br>pusillu                                                | +             | + |        |   |        |   |        | + |          |   | +      |   |        |   |        |   |

| Taxa                                                                                                     | Riverine zone |   |        |   |        |   |        |   | Dam zone |   |        |   |        |   |        |   |
|----------------------------------------------------------------------------------------------------------|---------------|---|--------|---|--------|---|--------|---|----------|---|--------|---|--------|---|--------|---|
|                                                                                                          | May 17        |   | Aug 17 |   | Oct 17 |   | Jan 18 |   | May 17   |   | Aug 17 |   | Oct 17 |   | Jan 18 |   |
|                                                                                                          | 100           | 1 | 100    | 1 | 100    | 1 | 100    | 1 | 100      | 1 | 100    | 1 | 100    | 1 | 100    | 1 |
| m<br>Freseni<br>us<br>1858                                                                               |               |   |        |   |        |   |        |   |          |   |        |   |        |   |        |   |
| 64 Monor<br>aphidi<br>um<br>arcuat<br>um<br>(Korsh<br>ikov)<br>Hindá<br>k 1970                           |               |   | +      | + |        | + | +      | + |          |   |        | + |        |   |        | + |
| 65 Monor<br>aphidi<br>um<br>contort<br>um<br>(Thure<br>t)<br>Komár<br>ková-<br>Legner<br>ová<br>1969     |               |   | +      |   | +      |   | +      | + | +        | + | +      | + | +      | + | +      | + |
| 66 Monor<br>aphidi<br>um<br>irregul<br>are<br>(G.M.S<br>mith)<br>Komár<br>ková-<br>Legner<br>ová<br>1969 |               |   |        |   |        |   |        |   | +        |   | +      | + | +      | + |        | + |
| 67 Monor<br>aphidi<br>um<br>komar<br>kovae<br>Nygaa<br>rd<br>1979                                        |               |   | +      |   |        | + | +      |   | +        |   | +      | + |        | + | +      | + |
| 68 Monor<br>aphidi<br>um<br>minut<br>um<br>(Nägel<br>i)<br>Komár                                         |               | + |        |   |        | + |        |   | +        |   |        |   |        |   |        |   |

| Taxa                                                                             | Riverine zone |   |        |   |        |   |        |   | Dam zone |   |        |   |        |   |        |   |
|----------------------------------------------------------------------------------|---------------|---|--------|---|--------|---|--------|---|----------|---|--------|---|--------|---|--------|---|
|                                                                                  | May 17        |   | Aug 17 |   | Oct 17 |   | Jan 18 |   | May 17   |   | Aug 17 |   | Oct 17 |   | Jan 18 |   |
|                                                                                  | 100           | 1 | 100    | 1 | 100    | 1 | 100    | 1 | 100      | 1 | 100    | 1 | 100    | 1 | 100    | 1 |
| ková-<br>Legner<br>ová<br>1969                                                   |               |   |        |   |        |   |        |   |          |   |        |   |        |   |        |   |
| 69 Mouge<br>otia sp.                                                             |               |   | +      |   | +      | + | +      | + | +        | + | +      | + |        |   | +      | + |
| 70 Oocyst<br>is sp. 1                                                            |               | + | +      |   |        |   | +      | + |          |   |        |   |        |   |        |   |
| 71 Oocyst<br>is sp. 2                                                            |               |   | +      |   |        |   |        |   |          |   |        |   |        |   |        |   |
| 72 Pando<br>rina<br>moru<br>m (O.<br>F.<br>Müller<br>) Bory<br>1826              |               | + |        |   |        |   |        |   | +        |   |        |   |        |   |        |   |
| 73 Radioc<br>occus<br>sp.                                                        | +             | + | +      | + | +      | + | +      | + | +        | + | +      | + | +      | + |        |   |
| 74 Staura<br>strum<br>chaeto<br>ceras<br>(Schrö<br>der)<br>G.M.S<br>mith<br>1924 |               |   |        |   |        |   | +      |   |          |   |        |   |        |   | +      | + |
| 75 Staura<br>strum<br>sp.                                                        |               |   |        |   |        |   |        |   | +        |   |        |   |        |   |        |   |
| 76 Tetraë<br>dron<br>incus<br>(Teilin<br>g)<br>G.M.<br>Smith<br>1926             |               |   |        |   |        |   |        |   | +        |   |        |   |        |   |        | + |
| 77 Treuba<br>ria sp.                                                             |               |   |        |   |        |   |        |   |          |   | +      |   |        |   |        |   |

100 = surface; 1 = lower limit of euphotic zone; + = presence of the taxon at the sampling point.

#### Environmental variables

The measured environmental variables varied significantly between sites ( $p < 0.05$ ), except for dissolved oxygen, water temperature, ammonium and chlorophyll *a*, but only water temperature varied significantly between months ( $p = 0.003$ ) (Table S5). The turbidity was highest in the riverine zone (i.e., transparency and  $Z_{eu}$  were low), reducing the light penetration in the water column.

Among the spatial variables, pH was slightly higher (pH 7.18) in the dam zone than in the riverine zone (pH 6.71), while the mean conductivity was higher in the riverine zone ( $83.50 \mu\text{S cm}^{-1}$ ) than in the dam zone ( $68.13 \mu\text{S cm}^{-1}$ ). Water temperatures peaked in October 2017 and January 2018 ( $22.5^\circ\text{C}$  and  $24.2^\circ\text{C}$ , respectively) and were lowest in May and August 2017 ( $19.0^\circ\text{C}$  and  $16.5^\circ\text{C}$ , respectively). None of the environmental variables varied significantly between depths ( $p > 0.05$ ).

Nutrient concentrations were higher in the riverine than in the dam zone, except for ammonium. For phosphorus, concentrations of TP were 4.5-fold higher in the riverine than the dam zone (means of  $51.82$  vs.  $11.70 \mu\text{g L}^{-1}$ , respectively), while soluble reactive phosphorus in the riverine zone ranged from  $3.28$  to  $7.37 \mu\text{g L}^{-1}$  but was below detection limit in the dam zone. TN mainly consisted of nitrate (79% in the riverine zone and 69% in the dam zone) with mean concentrations of  $0.83 \text{ mg L}^{-1}$  (riverine zone) and  $0.36 \text{ mg L}^{-1}$  (dam zone). Similarly, maximum nitrite occurred in the riverine zone ( $12.59 \mu\text{g L}^{-1}$ ) as compared to the dam zone ( $2.18 \mu\text{g L}^{-1}$ ). The highest ammonium concentration was detected in May 2017 in the dam zone ( $144.77 \mu\text{g L}^{-1}$ ), but was undetectable in October 2017 and January 2018 at the same sampling site. The mean TN:TP ratios were higher in the dam zone (149) than in the riverine zone (37), indicating a limitation by phosphorus in the dam.

Chlorophyll *a* varied between  $2.30$  and  $79.49 \mu\text{g L}^{-1}$  with the highest concentration detected in October 2017 in the riverine zone during a dinoflagellate bloom. The trophic state index classified the riverine zone as eutrophic and the dam zone as mesotrophic (Table S5).

**Table S5.** Environmental variables summarised as the mean values and ranges, and statistical results ( $p$  values) of non-parametric Mann-Whitney test for spatial differences (riverine and dam zone) and non-parametric Kruskal-Wallis for temporal differences (months) of the environmental variables in Itupararanga reservoir.

| Variables                                            | Riverine zone<br>(n = 8) | Dam zone<br>(n = 8)   | Spatial factor | Temporal factor |
|------------------------------------------------------|--------------------------|-----------------------|----------------|-----------------|
| Water transparency (m)*                              | 1.20 (0.90 - 1.60)       | 1.50 (1.20 - 1.90)    | -              | -               |
| $Z_{\text{eu}}$ (m)*                                 | 2.38 (2.00 - 3.00)       | 5.25 (4.50 - 7.00)    | -              | -               |
| pH                                                   | 6.71 (6.43 - 7.04)       | 7.18 (6.70 - 7.73)    | 0.010          | ns              |
| Dissolved oxygen ( $\text{mg L}^{-1}$ )              | 5.91 (3.18 - 8.49)       | 7.13 (6.21 - 8.62)    | ns             | ns              |
| Conductivity ( $\mu\text{S cm}^{-1}$ )               | 83.50 (65.00 - 101.00)   | 68.13 (63.00 - 73.00) | 0.014          | ns              |
| Turbidity (NTU)                                      | 10.65 (5.70 - 16.90)     | 5.25 (3.00 - 7.00)    | 0.003          | ns              |
| Water temperature ( $^\circ\text{C}$ )               | 19.97 (15.47 - 25.17)    | 21.15 (17.10 - 24.70) | ns             | 0.003           |
| Total phosphorus (TP) ( $\mu\text{g L}^{-1}$ )       | 51.82 (38.70 - 70.02)    | 11.70 (8.90 - 15.19)  | 0.001          | ns              |
| Soluble reactive phosphorus ( $\mu\text{g L}^{-1}$ ) | 5.64 (3.28 - 7.37)       | nd                    | 0.001          | ns              |
| Total nitrogen (TN) ( $\text{mg L}^{-1}$ )           | 1.05 (0.83 - 1.34)       | 0.52 (0.38 - 0.67)    | 0.001          | ns              |
| Nitrate ( $\text{mg L}^{-1}$ )                       | 0.83 (0.70 - 1.04)       | 0.36 (0.32 - 0.42)    | 0.001          | ns              |
| Nitrite ( $\mu\text{g L}^{-1}$ )                     | 5.70 (nd - 12.59)        | 0.77 (nd - 2.18)      | 0.006          | ns              |
| Ammonium ( $\mu\text{g L}^{-1}$ )                    | 40.49 (15.86 - 81.67)    | 46.09 (nd - 144.77)   | ns             | ns              |
| TN:TP                                                | 37 (24 - 60)             | 149 (56 - 237)        | 0.001          | ns              |
| Chlorophyll <i>a</i> ( $\mu\text{g L}^{-1}$ )        | 27.65 (2.30 - 79.43)     | 20.03 (15.79 - 23.29) | ns             | ns              |
| Trophic state                                        | Eutrophic                | Mesotrophic           | -              | -               |

---

\*Water transparency and  $Z_{eu}$  (lower limit of euphotic zone) ( $n = 4$ ); TN:TP = total nitrogen and total phosphorus ratio; nd = not detected; ns = not significant.
